# Supplementary material
Source: publisher figshare collection journal article supplement (https://sage.figshare.com/ndownloader/files/20045789)
Supplement: Supplementary file 1 [file 20045789]

## Appendix A: Vignettes

## Vignette condition 1: domestic violence (intimate partner) assault

Kate (the victim) and her husband, Paul (the perpetrator) have just walked into their local pub. Kate has chosen to sit at the back in a secluded booth and Paul has gone straight to the bar. Paul walks over to the booth with a beer and a wine for Kate. Kate politely tells Paul she does not feel like having a drink and would just like to have dinner. Paul begins shouting at and hurling insults at Kate before picking up a glass and throwing it across the table at Kate, narrowly missing her. Paul walks over to Kate’s side of the table, stands over her and punches her in the face. Kate is shocked as Paul had never been violent toward her in the past.

## Vignette condition 2: non-domestic violence (‘stranger’) assault

Kate (the victim) walks into a local pub and chooses to sit at the back in a secluded booth. Paul (the perpetrator) walks in moments after Kate. Paul walks straight to the bar and while waiting makes eye contact with Kate (whom he does not know). Paul walks over to the booth where Kate is sitting with a beer and a wine to offer to Kate. Kate politely tells Paul she does not feel like having a drink and would just like to have dinner alone. Paul begins shouting at and hurling insults at Kate before picking up a glass and throwing it across the table at Kate, narrowly missing her. Paul walks over to Kate’s side of the table, stands over her and punches her in the face. Kate is shocked as she had never met Paul before.
